# Supplementary material
Source: publisher site journal article supplement (https://www.kjim.org/upload/media/kjim-2020-634-suppl6.pdf)
Supplement: Supplementary file 1 [file kjim-2020-634-suppl6.pdf]

**Supplementary Table 6. Cox's regression analysis seeking risk factors for hemorrhage in myeloproliferative neoplasm (n = 335)**

| Variable                         | Univariate analysis |           |         |
|----------------------------------|---------------------|-----------|---------|
|                                  | HR                  | 95% CI    | p value |
| Age > 60 years                   | 1.26                | 0.54–2.76 | 0.625   |
| Male sex                         | 3.57                | 1.32–9.68 | 0.012   |
| Palpable splenomegaly            | 0.46                | 0.06–3.50 | 0.450   |
| WBC > $12.0 \times 10^9/L$       | 0.69                | 0.32–1.51 | 0.351   |
| Platelet > $1,000 \times 10^9/L$ | 1.24                | 0.50–2.04 | 0.646   |
| LDH > $1.5 \times UNL$           | 1.01                | 0.39–2.60 | 0.983   |
| Positive JAK2V617F               | 1.71                | 0.48–6.08 | 0.404   |
| ET                               | 0.69                | 0.30–1.57 | 0.372   |
| Pre-PMF                          | 1.27                | 0.42–3.87 | 0.676   |
| PV                               | 1.65                | 0.75–3.63 | 0.215   |
| PMF                              | 0.37                | 0.05–2.83 | 0.338   |
| Cytoreductive therapy            | 0.95                | 0.39–2.34 | 0.915   |
| Hypertension                     | 1.09                | 0.49–2.39 | 0.838   |
| Diabetes mellitus                | 0.70                | 0.24–2.11 | 0.531   |
| Chronic kidney disease           | 0.96                | 0.35–2.64 | 0.936   |
| Smoking                          | 2.03                | 0.90–4.56 | 0.087   |

HR, hazard ratio; CI, confidence interval; WBC, white blood cell; LDH, lactate dehydrogenase; UNL, upper normal limit; JAK2, Janus kinase 2; ET, essential thrombocythemia; pre-PMF, prefibrotic/early primary myelofibrosis; PV, polycythemia vera; PMF, primary myelofibrosis.
